# 1 Systematic comparison of family history and polygenic risk 2 across 24 common diseases

3

4

5 Nina Mars,<sup>1,2</sup> Joni V. Lindbohm,<sup>3,4</sup> Pietro della Briotta Parolo,<sup>1</sup> Elisabeth Widén,<sup>1</sup> Jaakko Kaprio,<sup>1,3</sup>  
6 Aarno Palotie,<sup>1,2,5</sup> *FinnGen*,\* Samuli Ripatti<sup>1,3,6</sup> #

7

8 1) Institute for Molecular Medicine Finland, FIMM, HiLIFE, University of Helsinki, Helsinki, Finland, 2) Stanley Center  
9 for Psychiatric Research, Broad Institute of MIT and Harvard, Cambridge, MA, USA, 3) Clincum, Department of Public  
10 Health, University of Helsinki, Helsinki, Finland, 4) Department of Epidemiology and Public Health, University College  
11 London, London, UK, 5) Analytic and Translational Genetics Unit, Department of Medicine, Massachusetts General  
12 Hospital, Boston, MA, USA, 6) Broad Institute of MIT and Harvard, Cambridge, MA, USA

13

14

15

16

17

18

19

20 Words: 3,092

21

22 **# Corresponding author**

23 Tel: +358 40 567 0826

24 Email: [samuli.ripatti@helsinki.fi](mailto:samuli.ripatti@helsinki.fi)

25 Address: Institute for Molecular Medicine (FIMM), Biomedicum 2U, Tukholmankatu 8, 00290, Helsinki,  
26 Finland

27

28 \* A list of FinnGen contributors is listed in the supplement

NOTE: This preprint reports new research that has not been certified by peer review and should not be used to guide clinical practice.

1 **ABSTRACT**

2 Family history is the standard indirect measure of inherited susceptibility in clinical care, while  
3 polygenic risk scores (PRS) have more recently demonstrated potential for more directly capturing  
4 genetic risk in many diseases. No studies have systematically compared how these overlap and  
5 complement each other across common diseases. Within FinnGen (N=306,418), we leverage family  
6 relationships, up to 50 years of nationwide registries, and genome-wide genotyping to examine the  
7 interplay of family history and genome-wide PRSs. We explore the dynamic for three types of family  
8 history across 24 common diseases: first- and second-degree family history, and parental causes of  
9 death. Covering a large proportion of the burden of non-communicable diseases in adults, we show  
10 that family history and PRS are independent and not interchangeable measures, but instead provide  
11 complementary information of inherited disease susceptibility. The PRSs explained on average 10%  
12 of the effect of first-degree family history, and first-degree family history 3% of PRSs, and PRS  
13 effects were independent of both early- and late-onset family history. The PRS stratified the risk  
14 similarly in individuals with and without family history. In most diseases, including coronary artery  
15 disease, glaucoma, and type 2 diabetes, a positive family history with a high PRS was associated with  
16 a considerably elevated risk, whereas a low PRS compensated completely for the risk implied by  
17 positive family history. This study provides a catalogue of risk estimates for both family history of  
18 disease and PRSs, and highlights opportunities for a more comprehensive way of assessing inherited  
19 disease risk across common diseases.

20

21

22 **KEYWORDS**

23 Polygenic risk score; family history; risk assessment

24

## 1 INTRODUCTION

2 Family history (FH) is a risk factor in most common, non-communicable diseases.<sup>1</sup> With multiple  
3 advantages including low cost and non-invasiveness, it captures both genetic and non-genetic familial  
4 risk and is therefore widely applied for risk stratification and health promotion. Common clinical  
5 applications include assessment of FH of breast cancer for targeted screening, earlier initiation of  
6 cardiovascular disease prevention, and evaluating the likelihood of rheumatic disease in patients with  
7 inflammatory arthritis.<sup>2-4</sup> Despite the advantages, assessment of FH also has important limitations in  
8 capturing inherited disease risk. Many individuals with common diseases have no FH, or may not  
9 know the diseases their relatives have, and the same level of familial risk is assigned to all relatives  
10 of similar degree. The accuracy of FH is fairly low owing to factors such as recall bias, and sensitivity  
11 to wording in queries may lead to misinterpretation of risk.<sup>5,6</sup> With average family sizes declining in  
12 many developed countries,<sup>7</sup> FH will also provide increasingly less information for a comprehensive  
13 assessment of familial risk.

14 The algorithmic developments and rapid growth in genome-wide genetic testing provides a  
15 more personalized approach for measuring genetic susceptibility through polygenic risk scores  
16 (PRS).<sup>8,9</sup> PRSs employ information from large-scale genetic screens comparing allele frequencies in  
17 thousands of disease cases and healthy controls and have identified numerous genetic loci for virtually  
18 all common diseases.<sup>10</sup> To estimate polygenic risks, the common genetic variation and the effects on  
19 the disease risks are integrated into a single metric, the PRS. The effectiveness of PRSs in risk  
20 stratification has been demonstrated for many diseases, with predictive value demonstrated alongside  
21 established clinical risk assessment tools.<sup>11</sup> Similarly, PRSs modify risk among carriers of high-risk  
22 variants and identify high-risk individuals for whom existing prediction tools are suboptimal.<sup>11-16</sup>

23 Given the initial expense of implementing PRS estimation in a clinical setting relative to the  
24 seemingly simple questions pertaining to family history, systematic evaluation of the independent  
25 added benefit of PRS across common diseases is essential. Studies on individual diseases have  
26 observed fairly independent effects of PRS and first-degree FH,<sup>11,15,17-27</sup> but no studies have  
27 systematically compared the relative contributions and overlap of PRS and FH across different types  
28 of familial risk, across varying genetic architectures, and across a wide range of diseases. Moreover,  
29 only few studies have used genome-wide PRSs, although these contemporary PRSs containing a large

1 number of variants have demonstrated improved performance beyond PRSs with less variants due to  
2 high polygenicity in common diseases.<sup>13,28-30</sup> Here we study the interplay of first and second-degree  
3 FH, parental causes of death, and genome-wide PRSs for 24 diseases using FinnGen (N=306,418),  
4 showing that FH and PRSs are largely independent and provide complementary information in risk  
5 assessment.

## 7 **MATERIAL AND METHODS**

### 8 *Participants and diseases*

9 This observational study uses FinnGen study Data Freeze 7, a collection of 306,418 adults (age  $\geq 18$ )  
10 from epidemiological cohorts, disease-based cohorts, and hospital biobanks (**Supplementary Table**  
11 **1**). We used three binary definitions for FH: 1) any type of first-degree FH (FH<sub>1st</sub> morbidity or  
12 mortality), 2) any type of second-degree FH (FH<sub>2nd</sub>), and 3) parental cause of death (FH<sub>P</sub>). Both for  
13 the index patients and their relatives (i.e. how FH was obtained), cases were identified through  
14 nationwide healthcare registries. The 24 diseases were chosen based on availability of large published  
15 genome-wide association studies (GWAS) with full summary statistics available for genome-wide  
16 PRSs (**Supplementary Table 2**). Case definitions are in **Supplementary Table 3**. Registry follow-  
17 up ended at Dec 31, 2019, with parental causes of death available until Dec 31, 2018. For FH<sub>P</sub>, we  
18 studied 15 out of the 24 diseases, identifying causes of death (immediate, contributing, and underlying  
19 causes of death). Details on genotypes, PRS generation and inference of relatedness is in  
20 Supplementary Methods.

### 22 *Polygenic risk scores*

23 For each of the 24 diseases, we constructed disease-specific PRSs in a systematic manner  
24 (**Supplementary Table 2**). The number of cases in the GWASs ranged from 3,769 (epilepsy) to  
25 567,460 (eGFR used for chronic kidney disease). PRS-CS was used for inferring posterior effect sizes  
26 for calculation of genome-wide PRSs<sup>31</sup> with 1000 Genomes Project European sample (N = 503) as  
27 the external linkage disequilibrium (LD) reference panel.<sup>32</sup> The PRS was analyzed primarily as a  
28 continuous variable, with selected analyses applying either a 1) binary definition of FH, with high  
29 PRS defined as a PRS in the top decile of the distribution, with the rest as the reference group, or 2)

1 PRS categories 0-10%, 10-20%, 20-40%, 40-60%, 60-80%, 80-90%, and 90-100%, with the  
2 reference group being 40-60%. To assess the impact of high vs low PRS, the reference category was  
3 33<sup>rd</sup> to 90<sup>th</sup> percentiles, and low PRS was defined as the lowest tertile of the distribution, to allow for  
4 a sufficient number of cases with low PRS.

5

## 6 ***Statistical analysis***

7 Associations between FH, PRS, and risk of disease was assessed with logistic regression, with models  
8 adjusted for sex, birth year, genotyping array, cohort, and the first ten genetic principal components  
9 of ancestry. The same adjustments were applied when calculating area under the receiver operator  
10 characteristic curve (AUC) estimates. AUC estimates with 95% CIs were calculated with R package  
11 pROC. Interactions between FH and the continuous PRS (scaled to zero mean and unit variance) was  
12 assessed by introducing their interaction term to the regression model, assessing statistical  
13 significance set at a p-value threshold of 0.0013 (Bonferroni-correction for 24+15 tests). Cumulative  
14 incidences by age 80 were estimated with Kaplan-Meier survival curves (R package survminer).  
15 Statistical analyses were performed using R, version 4.1.0.

16

17

## 18 **RESULTS**

19 FinnGen comprises 306,418 individuals (56.3% women; mean age 59.8 at the end of follow-up in  
20 2019, s.d. 17.3). For the 24 diseases, FH was defined as 1) first-degree family history, FH<sub>1st</sub>  
21 (morbidity or mortality), 2) second-degree family history, FH<sub>2nd</sub>, and 3) parental cause of death, FH<sub>p</sub>.  
22 Each identifies the relatives' diagnoses systematically through nationwide registries, including the  
23 hospital discharge registry (available from 1968-), causes of death registry (1964-), the Finnish  
24 Cancer Registry (1953-). FH<sub>1st</sub> and FH<sub>2nd</sub> leverage the genetic relatedness within FinnGen: out of  
25 306,418 individuals, we identified 39,444 with first-degree relative pairs based on the KING kinship  
26 coefficient<sup>33</sup> (see methods for details; 60.3% women; mean age 53.0, s.d. 16.5; parent-offspring  
27 relationship in 19,261 individuals, full-sibling in 20,183). For breast cancer, we studied only women  
28 (15,281 individuals, mother-daughter relationship in 7,770; full sisters in 7,511) and for prostate  
29 cancer, only men (9,473 individuals; father-son relationship in 3,932; full brothers in 5,541).

1 Similarly, we identified 47,154 individuals with a second-degree relative in the dataset (63.2%  
2 women, mean age 47.5, s.d. 15.0; N=18,973 for breast cancer; N=12,355 for prostate cancer).  
3 Parental causes of death (FH<sub>P</sub>), were linked through causes of death registry available from 1964 to  
4 2019 and we excluded 78,436 whose both parents have died before 1964 or who had missing data on  
5 both parents (e.g. due to emigration), resulting in 227,982 individuals (mean age 53.6, s.d. 15.1;  
6 N=133,653 for breast cancer; N=94,329 for prostate cancer; 70,225 (30.1%) with one and 73,299  
7 (32.2%) with two dead parents). See **Supplementary Figure 1** for study flow diagram.

8

### 9 ***Family history and risk of disease***

10 First, we systematically evaluated the effects of FH on risk of disease. **Figure 1** shows the prevalence  
11 of the diseases, and the prevalence and effect sizes for positive FH. The most common diseases were  
12 cardiometabolic diseases, followed by knee osteoarthritis and hypothyroidism. Positive FH<sub>1st</sub> was  
13 significantly associated with higher risk of disease in all 24 diseases except stroke. The effect sizes  
14 ranged from odds ratio (OR) 3.25 (95% confidence interval, CI, 2.41–4.37) in chronic kidney disease  
15 to OR 1.17 (0.98–1.39) in stroke (**Supplementary Table 4**). For FH<sub>2nd</sub>, 18/24 diseases showed  
16 evidence of an association, with their effect sizes ranging from OR 1.85 (1.19–2.89) in colorectal  
17 cancer to OR 1.17 (1.09–1.25) in hypertension (**Supplementary Table 5**). Compared to FH<sub>1st</sub>, the  
18 effect sizes for FH<sub>2nd</sub> were on average 69.1% lower (s.d. 25.0%; calculated from log odds), i.e. a third  
19 of the effect of FH<sub>1st</sub>. For FH<sub>P</sub>, out of the 24 diseases, we studied 15 diseases that are well captured  
20 by causes of death and used information from all recorded causes of death (immediate, contributing,  
21 and underlying causes of death on the death certificate). For all 15 diseases, we observed an  
22 association between FH<sub>P</sub> and risk of disease, with effect sizes ranging from OR 2.82 (2.25–3.53) in  
23 seropositive rheumatoid arthritis to OR 1.12 (1.04–1.20) in stroke (**Supplementary Table 6**).  
24 Compared to FH<sub>1st</sub>, the effect sizes for FH<sub>P</sub> were on average 30.1% lower (s.d. 22.4%), i.e. two thirds  
25 of the effect of FH<sub>1st</sub>.

26

### 27 ***Overlap of family history and polygenic risk***

28 Next, we compared the overlap between FH and PRSs. We constructed 24 genome-wide PRSs with  
29 uniform methodology using PRS-CS<sup>31</sup>, one for each disease (**Supplementary Table 2**). We first

1 compared the effects sizes per standard deviation (SD) increase for PRS, and FH<sub>1st</sub> (**Figure 2,**  
2 **Supplementary Table 4**). The PRS was associated with elevated risk in all 24 diseases. The higher  
3 the PRS, the higher was the proportion of positive FH (**Supplementary Figure 2**). Effect sizes for  
4 the PRS ranged from OR 2.33 (95%CI 2.10–2.558) in prostate cancer to OR 1.12 (1.05-1.20) in  
5 epilepsy. Adjusting the PRS effect size with FH<sub>1st</sub>, the change in effect size was small (mean decrease  
6 as log odds -3.0%, s.d. 1.3%). Adjusting the effect of FH<sub>1st</sub> with PRS led to a mean decrease of -  
7 10.3% (s.d. 6.0%), i.e. PRS explained of tenth of first-degree family history. No effect size decrease  
8 was observed for PRS adjusting with FH<sub>2nd</sub> (**Supplementary Table 5**). We observed similar results  
9 for FH<sub>P</sub> (**Supplementary Table 6**; effect size decrease adjusting PRS effects with FH<sub>P</sub> -0.7%, s.d.  
10 0.6%, vice versa -14.5%, s.d. 9.2%). Proportional decreases in log odds by disease for all definitions  
11 of FH are in **Figure 3**. FH generally explained a much smaller fraction of the effect of PRS than vice  
12 versa. A similar pattern was observed categorizing the PRS and comparing high PRS (>90<sup>th</sup>  
13 percentile) to the rest of the distribution (**Supplementary Table 7, Supplementary Figure 3**). A  
14 high PRS conferred on average similar effect sizes as FH<sub>1st</sub>. The effect sizes particularly in common  
15 cancers and cardiometabolic diseases were higher for the PRS, whereas the effect sizes for psychiatric  
16 diseases were higher for FH<sub>1st</sub>.

17 As early-onset FH is considered a particularly important familial risk factor, we also assessed  
18 the impact of FH<sub>P</sub> divided into tertiles of age at death. The largest effect size was observed for FH<sub>P</sub>  
19 with the lowest age tertile, in line with early-onset FH being a stronger risk factor than late-onset FH.  
20 Adjusting the PRS with this FH<sub>P</sub> divided into age tertiles had no impact on the effect sizes of the  
21 PRSs. Adjusting this FH<sub>P</sub> by PRS resulted in the largest effect size decreases for the youngest age  
22 tertile, but the decreases were overall small. These show that the PRS was independent of both early-  
23 and late-onset FH<sub>P</sub> (**Supplementary Table 8, Figure 4**).

24 With formal interaction testing, we did not identify any systematic interactions between FH  
25 and PRS (**Supplementary Figure 4**), which was further supported by observing similar PRS effect  
26 sizes in individuals with positive and negative FH<sub>1st</sub> (**Figure 5**).

27  
28

1 ***Polygenic risk in individuals with a positive family history***

2 Next, having assessed the overlap between FH and the PRSs, we estimated how high and low PRS  
3 impact disease risk in individuals with positive FH<sub>1st</sub>. Looking at cumulative incidence of risk of  
4 disease with the PRS divided into three groups (high PRS >90%, average PRS 33-90%, and low PRS  
5 <33%), we observed that a low PRS systematically compensated for the impact of positive FH<sub>1st</sub>, and  
6 individuals with a combination of high PRS and positive FH<sub>1st</sub> had a particularly high risk  
7 (**Figure 6**). Survival curves for a broader set of diseases, and survival curves stratifying individuals  
8 with no FH<sub>1st</sub> into similar PRS groups are in **Supplementary Figures 5–6**.

9  
10 ***Concordance of high polygenic risk in relatives***

11 Lastly, we assessed concordance – detection of a high PRS among first- and second-degree relatives,  
12 relevant for cascade screening in relatives of individuals with high PRS. We evaluated two questions:  
13 1) “What is the probability of having high PRS, if a relative has high PRS?” and 2) “How does this  
14 probability differ with relative’s disease status?”. For 1), on average 33.7% of the first-degree and  
15 19.8% of second-degree relatives had a similarly high PRS (**Supplementary Figures 7–8**). For 2),  
16 the concordance was somewhat higher with positive FH<sub>1st</sub> than with negative FH<sub>1st</sub>, with an average  
17 difference of 2.5% (range 0.0–7.9%). For FH<sub>2nd</sub>, no difference with disease status was observed  
18 (average 0.6%).

19  
20  
21 **DISCUSSION**

22 Covering a large proportion of the burden of non-communicable diseases in adults, we systematically  
23 compared the overlap of polygenic risk and different types of family history, showing that they  
24 provide independent and complementary information of inherited disease susceptibility in all 24  
25 studied diseases. PRS explained on average 10% of the effect of FH<sub>1st</sub>, but FH<sub>1st</sub> only 3% of the PRSs,  
26 and the PRSs were independent of both early- and late-onset family history. The PRS estimates  
27 stratified risk similarly in individuals with and without positive FH: a high PRS conferred a  
28 considerably elevated risk, whereas a low PRS compensated for the effect of FH.



1 To our knowledge, no previous studies have systematically compared how FH and PRS  
2 overlap and complement each other across common diseases. Our results are in line with previous  
3 disease-specific reports observing at most a modest attenuation in the effect of FH adjusting for PRS  
4 in cardiometabolic diseases, cancers, and depression.<sup>11,15,17-27</sup> We extend these by a systematic  
5 comparison across 24 common diseases, using genome-wide PRSs generated with uniform  
6 methodology, by measuring FH uniformly through nationwide healthcare registries, and by  
7 leveraging genetic relatedness. Our results show that effects of FH and polygenic risk scores are  
8 independent, indicating that these measures complement each other for assessment of inherited  
9 disease risk. Compared to prevention guidelines that do not recommend use of PRS when FH is  
10 available,<sup>3</sup> these results provide important novel data supporting the use of PRS for improving risk  
11 assessment of several diseases with major public health importance.

12 The largely independent effects have several potential explanations. In addition to capturing  
13 shared DNA, FH measures non-genetic exposures and behaviors shared by families. In contrast, PRSs  
14 capture each person's unique combinations of common, disease-associated genetic variants,  
15 including genetic risk variation not shared by the relatives. PRSs can be measured in any phase of  
16 life, whereas FH relies on disease events having actualized in relatives with utility in late-onset  
17 diseases. FH also assigns a similar risk for all relatives of the same degree, despite everyone carrying  
18 a unique set of genetic variants measurable through PRSs. Our observation of independent effects is  
19 also in line with earlier reports showing the importance of FH of breast and ovarian cancers in *BRCA1*  
20 and *BRCA2* mutation carriers.<sup>34</sup>

21 Genetic information is typically considered in clinical care only when evidence-based  
22 prevention strategies to attenuate risk are available.<sup>35</sup> For instance, risk assessment of cancers has  
23 long tradition of comprehensive ascertainment of FH to identify familial clustering<sup>36</sup> when targeted  
24 interventions and screening tools are available.<sup>2,37</sup> Our results indicate that PRSs could be used to  
25 refine risk assessment of breast, prostate, and colorectal cancer, even when information about FH is  
26 available. In glaucoma, a high PRS and FH had equal and largely independent effects, but only FH is  
27 currently used for assessing risk of glaucoma in patients with ocular hypertension.<sup>38</sup> The risk of  
28 coronary artery disease and type 2 diabetes can be decreased by lifestyle interventions and  
29 medications, and FH is commonly used for assessing their risk.<sup>3,39</sup> For both diseases, we observed

1 larger effects for high PRS than for FH. Moreover, a high PRS may identify individuals more likely  
2 to benefit from preventive treatments: for coronary artery disease, a high PRS can result in higher  
3 relative efficacy of statins and disclosing PRS risk together with traditional risk factors can motivate  
4 lifestyle changes.<sup>40-42</sup> In contrast, stroke PRSs and FH show lower effect sizes than other  
5 cardiovascular diseases, likely owing to the heterogeneity of the disease and differing etiological  
6 patterns of stroke subtypes.<sup>43,44</sup>

7 This study has multiple strengths. FH was assessed systematically and comprehensively by  
8 using linkages to high-quality nationwide registries, including hospital discharges, causes-of-death,  
9 and medication reimbursement registries, overcoming several limitations of self-reported FH such as  
10 recall bias, sensitivity to wording, and inter-individual differences in knowledge about FH.<sup>5,6,45</sup> We  
11 report effects of FH for disorders challenging to capture precisely from self-reported data, such as  
12 alcohol use disorder and atrial fibrillation, and show effects for diseases less studied in the field of  
13 PRSs including glaucoma and hypothyroidism. Moreover, we looked at the effect of a dichotomized  
14 PRS for comparison purposes and applying PRSs on the continuous scale would provide further risk  
15 stratification as unlike FH, extremes of PRSs can also be used to identify individuals at particularly  
16 high or low risk. FinnGen's wide age range is a key strength of the study, allowing systematic  
17 comparison of polygenic risk and FH across 24 diseases. Our results are also supported by  
18 quantitative genetic theory.<sup>46,47</sup> Average concordances of a high PRS among first- and second-degree  
19 relatives was 33.7% and 19.8%, in line with estimates on cardiometabolic diseases in UK Biobank,<sup>48</sup>  
20 and in agreement theoretically derived concordance estimates of 32.4% and 19.3%.<sup>47</sup> Moreover, the  
21 study provides catalogue of risk estimates for both FH of disease and PRSs in a large-scale biobank  
22 study.

23 The study was limited to individuals of European ancestry among whom current PRSs have  
24 the highest utility.<sup>49</sup> Although our recording of FH<sub>1st</sub> and FH<sub>2nd</sub> was primarily based on only one  
25 relative, FH<sub>p</sub> contained both parents, and FH estimates are well in line with earlier reports from  
26 epidemiological cohorts and large registry studies (**Supplementary Table 9**). Although the various  
27 registries are efficient in capturing cases, milder disease forms such as mild osteoarthritis or atopic  
28 dermatitis may remain uncaptured. Similarly, common conditions such as depression or alcohol use  
29 disorder are often underreported unless severe or contributing to somatic pathologies. With over half

1 of the study participants in the dataset ascertained from hospital biobanks or disease cohorts, the data  
2 is somewhat enriched in cases, resulting in cumulative incidences may not be fully generalizable to  
3 the population.

4 In conclusion, we studied the interplay of family history and genome-wide PRSs,  
5 systematically comparing effects across 24 common diseases. The effects of family history and PRS  
6 were largely independent, and the pattern was observed across the diseases. We demonstrate that  
7 polygenic risk and family history are not interchangeable measures of genetic susceptibility. Instead,  
8 they provide complementary information, bringing opportunities for a more comprehensive way of  
9 assessing inherited risk. A PRS can be calculated early of life to serve as risk indicator in individuals  
10 without family history of disease, while providing effective risk stratification also among individuals  
11 with positive family history.

12  
13  
14 **Acknowledgements** We thank the researchers who have openly shared the GWAS summary statistics that were  
15 used in this study to generate PRSs. We would like to thank Mervi Aavikko and Risto Kajanne for management  
16 assistance. The FinnGen project is funded by two grants from Business Finland (HUS 4685/31/2016 and UH  
17 4386/31/2016) and the following industry partners: AbbVie Inc., AstraZeneca UK Ltd, Biogen MA Inc., Bristol  
18 Myers Squibb, Genentech Inc., Merck Sharp & Dohme Corp, Pfizer Inc., GlaxoSmithKline Intellectual Property  
19 Development Ltd., Sanofi US Services Inc., Maze Therapeutics Inc., Janssen Biotech Inc, and Novartis Pharma  
20 AG. Following biobanks are acknowledged for delivering biobank samples to FinnGen: Auria Biobank  
21 ([www.auria.fi/biopankki](http://www.auria.fi/biopankki)), THL Biobank ([www.thl.fi/biobank](http://www.thl.fi/biobank)), Helsinki Biobank ([www.helsinginbiopankki.fi](http://www.helsinginbiopankki.fi)),  
22 Biobank Borealis of Northern Finland ([https://www.ppshep.fi/Tutkimus-ja-opetus/Biopankki/Pages/Biobank-](https://www.ppshep.fi/Tutkimus-ja-opetus/Biopankki/Pages/Biobank-Borealis-briefly-in-English.aspx)  
23 [Borealis-briefly-in-English.aspx](https://www.ppshep.fi/Tutkimus-ja-opetus/Biobank-Borealis-briefly-in-English.aspx)), Finnish Clinical Biobank Tampere ([www.tays.fi/en-](http://www.tays.fi/en-US/Research_and_development/Finnish_Clinical_Biobank_Tampere)  
24 [US/Research\\_and\\_development/Finnish\\_Clinical\\_Biobank\\_Tampere](http://www.tays.fi/en-US/Research_and_development/Finnish_Clinical_Biobank_Tampere)), Biobank of Eastern Finland ([www.ita-](http://www.ita-suomenbiopankki.fi/en)  
25 [suomenbiopankki.fi/en](http://www.ita-suomenbiopankki.fi/en)), Central Finland Biobank ([www.ksshp.fi/fi-FI/Potilaalle/Biopankki](http://www.ksshp.fi/fi-FI/Potilaalle/Biopankki)), Finnish Red Cross  
26 Blood Service Biobank ([www.veripalvelu.fi/verenluovutus/biopankkitoiminta](http://www.veripalvelu.fi/verenluovutus/biopankkitoiminta)) and Terveystalo Biobank  
27 ([www.terveystalo.com/fi/Yritystietoa/Terveystalo-Biopankki/Biopankki/](http://www.terveystalo.com/fi/Yritystietoa/Terveystalo-Biopankki/Biopankki/)). All Finnish Biobanks are members of  
28 BBMRI.fi infrastructure ([www.bbMRI.fi](http://www.bbMRI.fi)) and FINBB biobank cooperative (<https://finbb.fi/>) is the coordinator of the  
29 BBMRI-ERIC operations in Finland covering all Finnish biobanks.

30 This work has been supported by Academy of Finland (grant number 331671 to N.M., 285380 to S.R.,  
31 128650 to A.P., 308248 to J.K.); Academy of Finland Center of Excellence in Complex Disease Genetics (grant

1 number 312062 to S.R., 312074 to A.P., 312073 to J.K.); European Union's Horizon 2020 research and innovation  
2 programme under grant agreement No 101016775; the Sigrid Jusélius Foundation (to S.R. and A.P.); University of  
3 Helsinki HiLIFE Fellow grants 2017-2020 (to S.R.); The Finnish Innovation Fund Tekes (grant number  
4 2273/31/2017 to E.W.); Foundation and the Horizon 2020 Research and Innovation Programme (grant number  
5 667301 (COSYN) to A.P.); JVL was supported by Academy of Finland (grant number 311492) and Helsinki  
6 Institute of Life Science (H970).

7  
8 **Declaration of Interests** A.P. is a member of the Pfizer Genetics Scientific Advisory Panel. The remaining  
9 authors declare no competing interests.

10

11 **Data availability** The FinnGen data may be accessed through Finnish Biobanks' FinBB portal (web link:  
12 [www.finbb.fi](http://www.finbb.fi), email: [info.fingenious@finbb.fi](mailto:info.fingenious@finbb.fi)). Download links for the GWAS summary statistics used for  
13 constructing are provided in Supplementary Table 1. The weights for our polygenic risk scores will be made  
14 available at PGS Catalog ([pgs-info@ebi.ac.uk](mailto:pgs-info@ebi.ac.uk)), with the submitted data embargoed until publication and  
15 PGS Catalog identifiers reported in the final version of the manuscript.

16

17 **Code availability** The full genotyping and imputation protocol for FinnGen is described  
18 at <https://doi.org/10.17504/protocols.io.xbgfijw>. The PRS-CS pipeline in FinnGen is described at  
19 <https://github.com/FINNGEN/CS-PRS-pipeline>.

20

## 21 **Author contributions**

22 N.M., J.V.L., and S.R. conceived and designed the study. N.M. and P.D.B.P carried out the statistical and  
23 computational analyses with advice from S.R. and J.V.L. Quality control of the data was carried out by N.M.  
24 and P.D.B.P. All authors provided critical inputs to interpretation of the data. The manuscript was written and  
25 revised by N.M. and S.R., with comments from all of the co-authors. All co-authors have approved the final  
26 version of the manuscript.

27

## 1   **References**

- 2
- 3   1.    Valdez, R., Yoon, P.W., Qureshi, N., Green, R.F., and Khoury, M.J. (2010). Family history  
4    in public health practice: a genomic tool for disease prevention and health promotion. *Annu.*  
5    *Rev. Public Health* *31*, 69-87 61 p following 87.  
6    10.1146/annurev.publhealth.012809.103621.
  - 7   2.    Daly, M.B., Pal, T., Berry, M.P., Buys, S.S., Dickson, P., Domchek, S.M., Elkhanany, A.,  
8    and Friedman, S. NCCN Clinical Practice Guidelines in Oncology: Genetics/Familial High-  
9    Risk Assessment: Breast, Ovarian, and Pancreatic Version 2.2021. NCCN.org.
  - 10  3.    Piepoli, M.F., Hoes, A.W., Agewall, S., Albus, C., Brotons, C., Catapano, A.L., Cooney,  
11  M.T., Corra, U., Cosyns, B., Deaton, C., et al. (2016). 2016 European Guidelines on  
12  cardiovascular disease prevention in clinical practice: The Sixth Joint Task Force of the  
13  European Society of Cardiology and Other Societies on Cardiovascular Disease Prevention  
14  in Clinical Practice (constituted by representatives of 10 societies and by invited  
15  experts)Developed with the special contribution of the European Association for  
16  Cardiovascular Prevention & Rehabilitation (EACPR). *Eur. Heart J.* *37*, 2315-2381.  
17  10.1093/eurheartj/ehw106.
  - 18  4.    Frisell, T., Saevarsdottir, S., and Askling, J. (2016). Family history of rheumatoid arthritis:  
19  an old concept with new developments. *Nat Rev Rheumatol* *12*, 335-343.  
20  10.1038/nrrheum.2016.52.
  - 21  5.    Conway-Pearson, L.S., Christensen, K.D., Savage, S.K., Huntington, N.L., Weitzman, E.R.,  
22  Ziniel, S.I., Bacon, P., Cacioppo, C.N., Green, R.C., and Holm, I.A. (2016). Family health  
23  history reporting is sensitive to small changes in wording. *Genet. Med.* *18*, 1308-1311.  
24  10.1038/gim.2016.45.
  - 25  6.    Wilson, B.J., Qureshi, N., Santaguida, P., Little, J., Carroll, J.C., Allanson, J., and Raina, P.  
26  (2009). Systematic review: family history in risk assessment for common diseases. *Ann.*  
27  *Intern. Med.* *151*, 878-885. 10.7326/0003-4819-151-12-200912150-00177.
  - 28  7.    United Nations, Department of Economic and Social Affairs, Population Division. Patterns  
29  and trends in household size and composition: Evidence from a United Nations dataset.  
30  (ST/ESA/SER.A/433). (2019).
  - 31  8.    Lewis, C.M., and Vassos, E. (2020). Polygenic risk scores: from research tools to clinical  
32  instruments. *Genome Med* *12*, 44. 10.1186/s13073-020-00742-5.
  - 33  9.    Chatterjee, N., Shi, J., and Garcia-Closas, M. (2016). Developing and evaluating polygenic  
34  risk prediction models for stratified disease prevention. *Nat. Rev. Genet.* *17*, 392-406.  
35  10.1038/nrg.2016.27.
  - 36  10.   Loos, R.J.F. (2020). 15 years of genome-wide association studies and no signs of slowing  
37  down. *Nature Communications* *11*, 5900. 10.1038/s41467-020-19653-5.
  - 38  11.   Mars, N., Koskela, J.T., Ripatti, P., Kiiskinen, T.T.J., Havulinna, A.S., Lindbohm, J.V.,  
39  Ahola-Olli, A., Kurki, M., Karjalainen, J., Palta, P., et al. (2020). Polygenic and clinical risk  
40  scores and their impact on age at onset and prediction of cardiometabolic diseases and  
41  common cancers. *Nat. Med.* 10.1038/s41591-020-0800-0.
  - 42  12.   Fahed, A.C., Wang, M., Homburger, J.R., Patel, A.P., Bick, A.G., Neben, C.L., Lai, C.,  
43  Brockman, D., Philippakis, A., Ellinor, P.T., et al. (2020). Polygenic background modifies  
44  penetrance of monogenic variants for tier 1 genomic conditions. *Nat Commun* *11*, 3635.  
45  10.1038/s41467-020-17374-3.
  - 46  13.   Mars, N., Widén, E., Kerminen, S., Meretoja, T., Pirinen, M., della Briotta Parolo, P., Palta,  
47  P., Havulinna, A., Elliott, A., Shcherban, A., et al. (2020). The role of polygenic risk and

- 1 susceptibility genes in breast cancer over the course of life. *Nature Communications* 11,  
2 6383. [10.1038/s41467-020-19966-5](https://doi.org/10.1038/s41467-020-19966-5).
- 3 14. Isgut, M., Sun, J., Quyyumi, A.A., and Gibson, G. (2021). Highly elevated polygenic risk  
4 scores are better predictors of myocardial infarction risk early in life than later. *Genome*  
5 *Med* 13, 13. [10.1186/s13073-021-00828-8](https://doi.org/10.1186/s13073-021-00828-8).
- 6 15. Archambault, A.N., Su, Y.R., Jeon, J., Thomas, M., Lin, Y., Conti, D.V., Win, A.K.,  
7 Sakoda, L.C., Lansdorp-Vogelaar, I., Peterse, E.F.P., et al. (2020). Cumulative Burden of  
8 Colorectal Cancer-Associated Genetic Variants Is More Strongly Associated With Early-  
9 Onset vs Late-Onset Cancer. *Gastroenterology* 158, 1274-1286 e1212.  
10 [10.1053/j.gastro.2019.12.012](https://doi.org/10.1053/j.gastro.2019.12.012).
- 11 16. Conti, D.V., Darst, B.F., Moss, L.C., Saunders, E.J., Sheng, X., Chou, A., Schumacher,  
12 F.R., Olama, A.A.A., Benlloch, S., Dadaev, T., et al. (2021). Trans-ancestry genome-wide  
13 association meta-analysis of prostate cancer identifies new susceptibility loci and informs  
14 genetic risk prediction. *Nat. Genet.* 53, 65-75. [10.1038/s41588-020-00748-0](https://doi.org/10.1038/s41588-020-00748-0).
- 15 17. Inouye, M., Abraham, G., Nelson, C.P., Wood, A.M., Sweeting, M.J., Dudbridge, F., Lai,  
16 F.Y., Kaptoge, S., Brozynska, M., Wang, T., et al. (2018). Genomic Risk Prediction of  
17 Coronary Artery Disease in 480,000 Adults: Implications for Primary Prevention. *J. Am.*  
18 *Coll. Cardiol.* 72, 1883-1893. [10.1016/j.jacc.2018.07.079](https://doi.org/10.1016/j.jacc.2018.07.079).
- 19 18. Tikkanen, E., Havulinna, A.S., Palotie, A., Salomaa, V., and Ripatti, S. (2013). Genetic risk  
20 prediction and a 2-stage risk screening strategy for coronary heart disease. *Arterioscler.*  
21 *Thromb. Vasc. Biol.* 33, 2261-2266. [10.1161/ATVBAHA.112.301120](https://doi.org/10.1161/ATVBAHA.112.301120).
- 22 19. Hughes, E., Tshiaba, P., Gallagher, S., Wagner, S., Judkins, T., Roa, B., Rosenthal, E.,  
23 Domchek, S., Garber, J., Lancaster, J., et al. (2020). Development and Validation of a  
24 Clinical Polygenic Risk Score to Predict Breast Cancer Risk. *JCO Precis Oncol* 4.  
25 [10.1200/PO.19.00360](https://doi.org/10.1200/PO.19.00360).
- 26 20. Agerbo, E., Trabjerg, B.B., Borglum, A.D., Schork, A.J., Vilhjalmsen, B.J., Pedersen,  
27 C.B., Hakulinen, C., Albinana, C., Hougaard, D.M., Grove, J., et al. (2021). Risk of Early-  
28 Onset Depression Associated With Polygenic Liability, Parental Psychiatric History, and  
29 Socioeconomic Status. *JAMA Psychiatry* 78, 387-397. [10.1001/jamapsychiatry.2020.4172](https://doi.org/10.1001/jamapsychiatry.2020.4172).
- 30 21. InterAct Consortium, Scott, R.A., Langenberg, C., Sharp, S.J., Franks, P.W., Rolandsson,  
31 O., Drogan, D., van der Schouw, Y.T., Ekelund, U., Kerrison, N.D., et al. (2013). The link  
32 between family history and risk of type 2 diabetes is not explained by anthropometric,  
33 lifestyle or genetic risk factors: the EPIC-InterAct study. *Diabetologia* 56, 60-69.  
34 [10.1007/s00125-012-2715-x](https://doi.org/10.1007/s00125-012-2715-x).
- 35 22. Tada, H., Melander, O., Louie, J.Z., Catanese, J.J., Rowland, C.M., Devlin, J.J., Kathiresan,  
36 S., and Shiffman, D. (2016). Risk prediction by genetic risk scores for coronary heart  
37 disease is independent of self-reported family history. *Eur. Heart J.* 37, 561-567.  
38 [10.1093/eurheartj/ehv462](https://doi.org/10.1093/eurheartj/ehv462).
- 39 23. Muranen, T.A., Mavaddat, N., Khan, S., Fagerholm, R., Pelttari, L., Lee, A., Aittomaki, K.,  
40 Blomqvist, C., Easton, D.F., and Nevanlinna, H. (2016). Polygenic risk score is associated  
41 with increased disease risk in 52 Finnish breast cancer families. *Breast Cancer Res. Treat.*  
42 158, 463-469. [10.1007/s10549-016-3897-6](https://doi.org/10.1007/s10549-016-3897-6).
- 43 24. Agerbo, E., Sullivan, P.F., Vilhjalmsen, B.J., Pedersen, C.B., Mors, O., Borglum, A.D.,  
44 Hougaard, D.M., Hollegaard, M.V., Meier, S., Mattheisen, M., et al. (2015). Polygenic Risk  
45 Score, Parental Socioeconomic Status, Family History of Psychiatric Disorders, and the  
46 Risk for Schizophrenia: A Danish Population-Based Study and Meta-analysis. *JAMA*  
47 *Psychiatry* 72, 635-641. [10.1001/jamapsychiatry.2015.0346](https://doi.org/10.1001/jamapsychiatry.2015.0346).
- 48 25. Mavaddat, N., Michailidou, K., Dennis, J., Lush, M., Fachal, L., Lee, A., Tyrer, J.P., Chen,  
49 T.H., Wang, Q., Bolla, M.K., et al. (2019). Polygenic Risk Scores for Prediction of Breast

- 1 Cancer and Breast Cancer Subtypes. *Am. J. Hum. Genet.* *104*, 21-34.  
2 10.1016/j.ajhg.2018.11.002.
- 3 26. Li, H., Feng, B., Miron, A., Chen, X., Beesley, J., Bimeh, E., Barrowdale, D., John, E.M.,  
4 Daly, M.B., Andrulis, I.L., et al. (2017). Breast cancer risk prediction using a polygenic risk  
5 score in the familial setting: a prospective study from the Breast Cancer Family Registry and  
6 kConFab. *Genet. Med.* *19*, 30-35. 10.1038/gim.2016.43.
- 7 27. Moll, M., Lutz, S.M., Ghosh, A.J., Sakornsakolpat, P., Hersh, C.P., Beaty, T.H., Dudbridge,  
8 F., Tobin, M.D., Mittleman, M.A., Silverman, E.K., et al. (2020). Relative contributions of  
9 family history and a polygenic risk score on COPD and related outcomes: COPDGene and  
10 ECLIPSE studies. *BMJ Open Respir Res* *7*. 10.1136/bmjresp-2020-000755.
- 11 28. Khera, A.V., Chaffin, M., Aragam, K.G., Haas, M.E., Roselli, C., Choi, S.H., Natarajan, P.,  
12 Lander, E.S., Lubitz, S.A., Ellinor, P.T., and Kathiresan, S. (2018). Genome-wide polygenic  
13 scores for common diseases identify individuals with risk equivalent to monogenic  
14 mutations. *Nat. Genet.* *50*, 1219-1224. 10.1038/s41588-018-0183-z.
- 15 29. Dikilitas, O., Schaid, D.J., Kosel, M.L., Carroll, R.J., Chute, C.G., Denny, J.A., Fedotov, A.,  
16 Feng, Q., Hakonarson, H., Jarvik, G.P., et al. (2020). Predictive Utility of Polygenic Risk  
17 Scores for Coronary Heart Disease in Three Major Racial and Ethnic Groups. *Am. J. Hum.*  
18 *Genet.* *106*, 707-716. 10.1016/j.ajhg.2020.04.002.
- 19 30. Mars, N., Kerminen, S., Feng, Y.-C.A., Kanai, M., Läll, K., Thomas, L.F., Skogholt, A.H.,  
20 della Briotta Parolo, P., Neale, B.M., Smoller, J.W., et al. (2022). Genome-wide risk  
21 prediction of common diseases across ancestries in one million people. *Cell Genomics* *2*.  
22 10.1016/j.xgen.2022.100118.
- 23 31. Ge, T., Chen, C.Y., Ni, Y., Feng, Y.A., and Smoller, J.W. (2019). Polygenic prediction via  
24 Bayesian regression and continuous shrinkage priors. *Nat Commun* *10*, 1776.  
25 10.1038/s41467-019-09718-5.
- 26 32. Genomes Project Consortium, Auton, A., Brooks, L.D., Durbin, R.M., Garrison, E.P., Kang,  
27 H.M., Korbel, J.O., Marchini, J.L., McCarthy, S., McVean, G.A., and Abecasis, G.R.  
28 (2015). A global reference for human genetic variation. *Nature* *526*, 68-74.  
29 10.1038/nature15393.
- 30 33. Manichaikul, A., Mychaleckyj, J.C., Rich, S.S., Daly, K., Sale, M., and Chen, W.M. (2010).  
31 Robust relationship inference in genome-wide association studies. *Bioinformatics* *26*, 2867-  
32 2873. 10.1093/bioinformatics/btq559.
- 33 34. Kuchenbaecker, K.B., Hopper, J.L., Barnes, D.R., Phillips, K.A., Mooij, T.M., Roos-Blom,  
34 M.J., Jervis, S., van Leeuwen, F.E., Milne, R.L., Andrieu, N., et al. (2017). Risks of Breast,  
35 Ovarian, and Contralateral Breast Cancer for BRCA1 and BRCA2 Mutation Carriers.  
36 *JAMA* *317*, 2402-2416. 10.1001/jama.2017.7112.
- 37 35. ACMG Board of Directors (2015). Clinical utility of genetic and genomic services: a  
38 position statement of the American College of Medical Genetics and Genomics. *Genet.*  
39 *Med.* *17*, 505-507. 10.1038/gim.2015.41.
- 40 36. Bennett, R.L. (2010). *The practical guide to genetic family history*, 2nd edition. (Wiley-  
41 Blackwell).
- 42 37. Provenzale, D., Gupta, S., Ahnen, D.J., Chen, L.-M., Chung, D.C., Cooper, G., Earlu, D.S.,  
43 Giardiello, F.M., and Grady, W. (2019). NCCN Clinical Practice Guidelines in Oncology:  
44 Genetic/Familial High-Risk Assessment: Colorectal Version 3.2019. *J. Natl. Compr. Canc.*  
45 *Netw.* *14*, 1010-1030. 10.6004/jnccn.2016.0108.
- 46 38. National Institute for Health and Care Excellence (2017). Glaucoma: diagnosis and  
47 management [NICE guideline No. 81] <https://www.nice.org.uk/guidance/ng81>.
- 48 39. American Diabetes Association (2021). 3. Prevention or Delay of Type 2 Diabetes:  
49 Standards of Medical Care in Diabetes-2021. *Diabetes Care* *44*, S34-S39. 10.2337/dc21-  
50 S003.

- 1 40. Natarajan, P., Young, R., Stitzel, N.O., Padmanabhan, S., Baber, U., Mehran, R., Sartori,  
2 S., Fuster, V., Reilly, D.F., Butterworth, A., et al. (2017). Polygenic Risk Score Identifies  
3 Subgroup With Higher Burden of Atherosclerosis and Greater Relative Benefit From Statin  
4 Therapy in the Primary Prevention Setting. *Circulation* *135*, 2091-2101.  
5 10.1161/CIRCULATIONAHA.116.024436.
- 6 41. Mega, J.L., Stitzel, N.O., Smith, J.G., Chasman, D.I., Caulfield, M., Devlin, J.J., Nordio, F.,  
7 Hyde, C., Cannon, C.P., Sacks, F., et al. (2015). Genetic risk, coronary heart disease events,  
8 and the clinical benefit of statin therapy: an analysis of primary and secondary prevention  
9 trials. *Lancet* *385*, 2264-2271. 10.1016/S0140-6736(14)61730-X.
- 10 42. Widén, E., Junna, N., Ruotsalainen, S., Surakka, I., Mars, N., Ripatti, P., Partanen, J.J., Aro,  
11 J., Mustonen, P., Tuomi, T., et al. (2020). Communicating polygenic and non-genetic risk  
12 for atherosclerotic cardiovascular disease - An observational follow-up study. medRxiv,  
13 2020.2009.2018.20197137. 10.1101/2020.09.18.20197137.
- 14 43. Abraham, G., Malik, R., Yonova-Doing, E., Salim, A., Wang, T., Danesh, J., Butterworth,  
15 A.S., Howson, J.M.M., Inouye, M., and Dichgans, M. (2019). Genomic risk score offers  
16 predictive performance comparable to clinical risk factors for ischaemic stroke. *Nat*  
17 *Commun* *10*, 5819. 10.1038/s41467-019-13848-1.
- 18 44. Malik, R., Chauhan, G., Traylor, M., Sargurupremraj, M., Okada, Y., Mishra, A., Rutten-  
19 Jacobs, L., Giese, A.K., van der Laan, S.W., Gretarsdottir, S., et al. (2018). Multiancestry  
20 genome-wide association study of 520,000 subjects identifies 32 loci associated with stroke  
21 and stroke subtypes. *Nat. Genet.* *50*, 524-537. 10.1038/s41588-018-0058-3.
- 22 45. Drews, C.D., and Greeland, S. (1990). The impact of differential recall on the results of  
23 case-control studies. *Int. J. Epidemiol.* *19*, 1107-1112. 10.1093/ije/19.4.1107.
- 24 46. Do, C.B., Hinds, D.A., Francke, U., and Eriksson, N. (2012). Comparison of family history  
25 and SNPs for predicting risk of complex disease. *PLoS Genet.* *8*, e1002973.  
26 10.1371/journal.pgen.1002973.
- 27 47. Carmi, S. (2021). Cascade screening following a polygenic risk score test: what is the  
28 disease risk of a sibling conditional on a high score in a proband? bioRxiv,  
29 2021.2004.2011.439329. 10.1101/2021.04.11.439329.
- 30 48. Reid, N.J., Brockman, D.G., Elisabeth Leonard, C., Pelletier, R., and Khera, A.V. (2021).  
31 Concordance of a High Polygenic Score Among Relatives: Implications for Genetic  
32 Counseling and Cascade Screening. *Circ Genom Precis Med* *14*, e003262.  
33 10.1161/CIRCGEN.120.003262.
- 34 49. Martin, A.R., Kanai, M., Kamatani, Y., Okada, Y., Neale, B.M., and Daly, M.J. (2019).  
35 Clinical use of current polygenic risk scores may exacerbate health disparities. *Nat. Genet.*  
36 *51*, 584-591. 10.1038/s41588-019-0379-x.
- 37



1 **Figure 1. Disease prevalence and prevalence and effect sizes of positive family history. Panel A:** disease prevalence in individuals for whom we studied risk of  
 2 first-degree family history **Panel B:** Prevalence of first-degree family history (left column), second-degree family history (middle column), and parental cause of  
 3 death (right column). **Panel C:** Effect size of first-degree family history (left column), second-degree family history (middle column), and parental cause of death  
 4 (right column) with respective diseases. For parental causes of death, we studied 15 out of the 24 diseases.

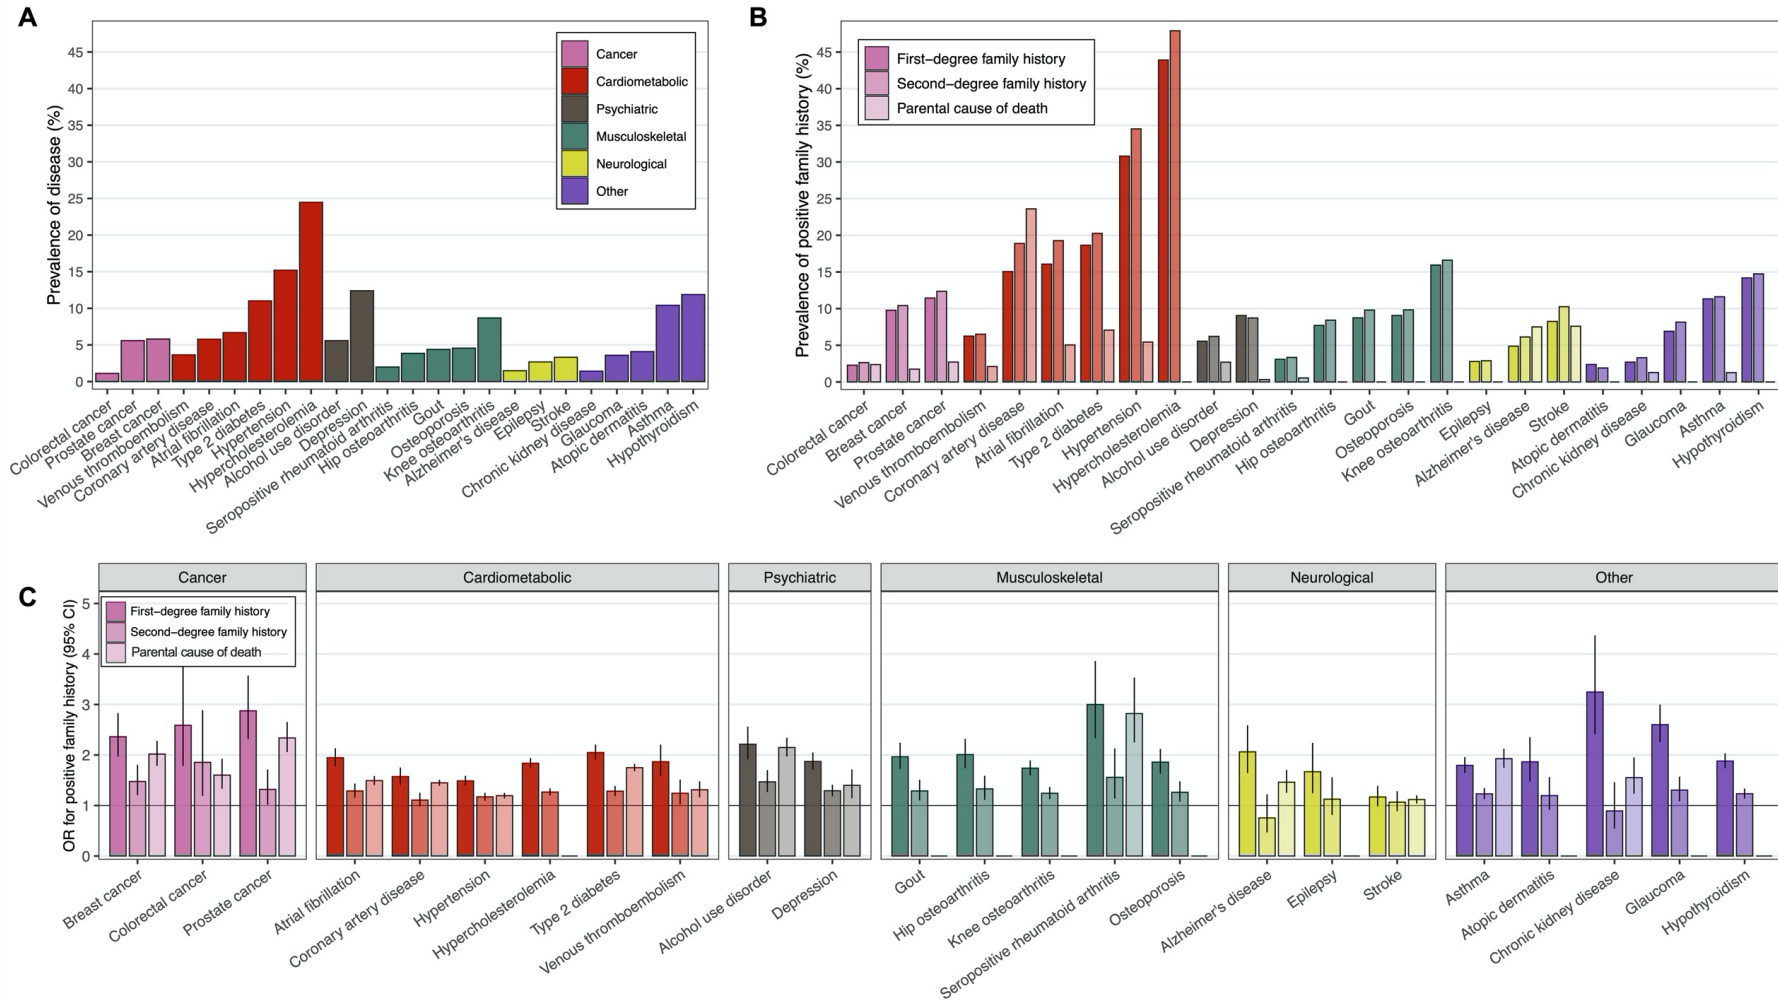

5 Sample size in panel A: total N = 39,444, N = 15,281 for breast cancer, N = 9,473 for prostate cancer. Sample sizes in panels B-C: first-degree family history as in panel A, second-degree family history total N = 47,154,  
 6 N = 18,973 for breast cancer, N = 12,355 for prostate cancer, and parental causes total N = 227,982, N = 133,653 for breast cancer; N = 94,329 for prostate cancer. Odds ratios (OR) were obtained from logistic regression  
 7 models adjusted for sex (except for breast and prostate cancer), birth year, genotyping array, cohort, and the first ten genetic principal components of ancestry.  
 8

1 **Figure 2.** Cross-adjustment effects for first-degree family history ( $FH_{1st}$ ), and respective polygenic risk scores (PRS). The impact of adjusting the PRS effect with first-  
 2 degree  $FH_{1st}$  (**panel A**) and vice versa (**panel B**). The diamonds represent the unadjusted effects and the squares the adjusted effects. The PRS explained on average  
 3 10% of the effect of  $FH_{1st}$ , but  $FH_{1st}$  only 3% of the PRSs. The PRS effect is shown per one SD increase.  
 4

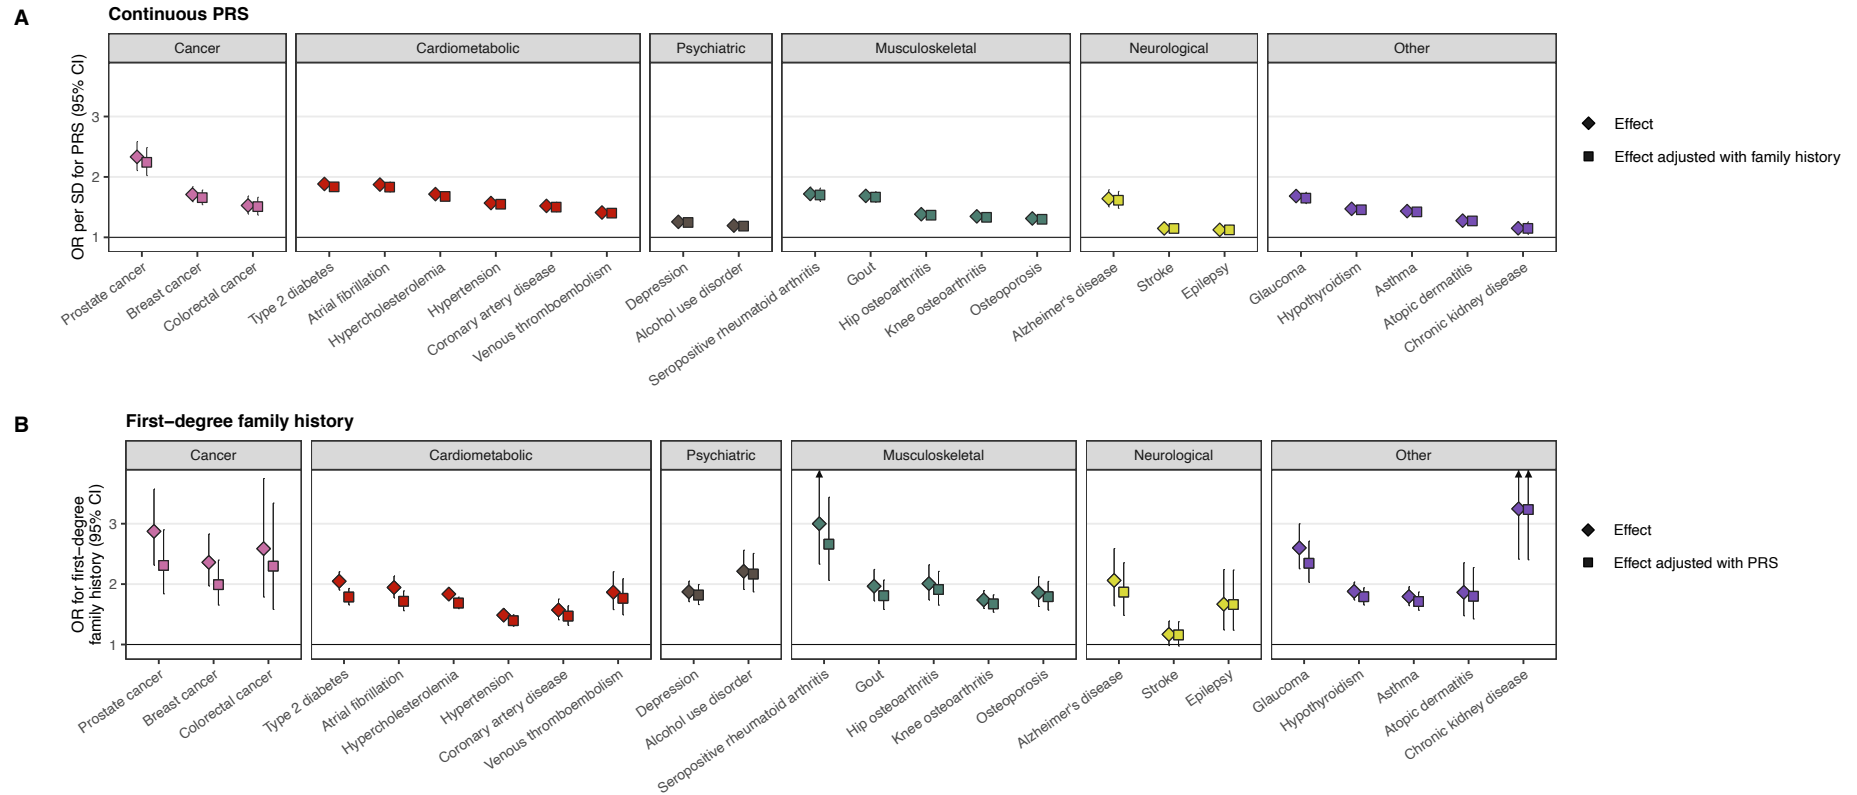

5  
 6  
 7 Total N = 39,444, N = 15,281 for breast cancer, N = 9,473 for prostate cancer. Odds ratios (OR) were obtained from logistic regression models adjusted for sex (except for breast and prostate cancer), birth year,  
 8 genotyping array, cohort, and the first ten genetic principal components of ancestry.

1 **Figure 3.** Proportional decreases in log odds by disease for first-degree family history FH<sub>1st</sub> (panels **A-B**), for  
 2 second-degree family history FH<sub>2nd</sub> (panels **C-D**), and parental causes of death FH<sub>P</sub> (panels **E-F**). The left column  
 3 (panels **A, C, E**) represents decreases in effect size of high polygenic risk score (PRS; defined as top 10% of the  
 4 distribution) adjusting for family history. The right column (panels **B, D, F**) represents decreases in effect size of  
 5 family history adjusting for high PRS. The y axis represents the decrease in the effect size, calculated by dividing  
 6 the log odds from the adjusted logistic regression model with the log odds from the non-adjusted model. For  
 7 instance, in panel **A**, the y axis represents the following quantity: (log odds of PRS adjusting for FH<sub>1st</sub>) / (log odds  
 8 of PRS without adjusting for FH<sub>1st</sub>).

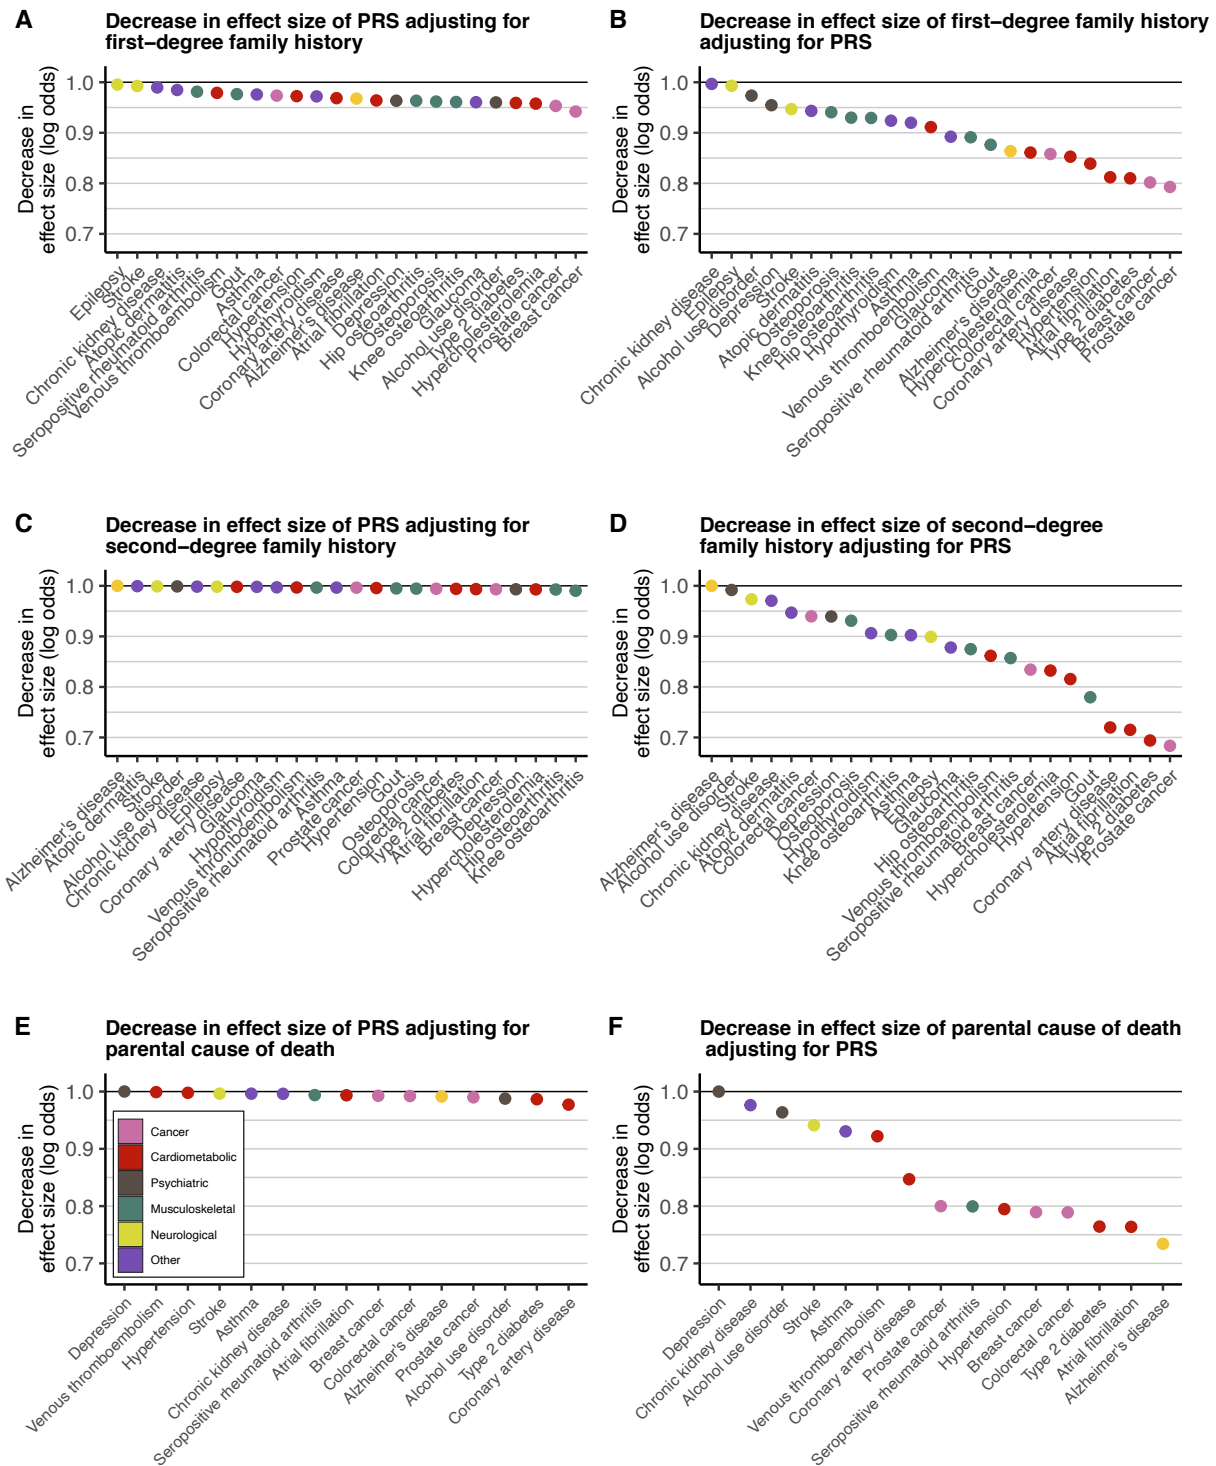

9  
10  
11

The reference category for PRS was the rest of the distribution (individuals below the 90<sup>th</sup> percentile). In panel **D**, the proportion of Alzheimer's disease was set at 1.00 as we did not observe any association for second-degree family history of Alzheimer's disease.

1 **Figure 4.** Polygenic risk is independent of both early- and late-onset family history. As early-onset family history is considered a particularly important familial risk  
 2 factor, we also assessed the impact of FH<sub>p</sub> divided into tertiles of age at death. **Panel A:** Adjusting the effect of polygenic risk score (PRS; per SD) by parental causes  
 3 of death (FH<sub>p</sub>) divided into tertiles of age at death had no impact on the effect sizes of the PRSs. **Panel B:** Adjusting the effects FH<sub>p</sub> by tertiles of age at death by PRS  
 4 resulted in the largest effect size decreases for the youngest age tertile, however, for most diseases the difference by age tertile was small. The diamonds represent the  
 5 unadjusted effects and the squares the adjusted effects. In panel B, the effect sizes from with lowest to highest age at death are displayed from left to right, and the  
 6 reference group for each disease is individuals with negative FH<sub>p</sub>.

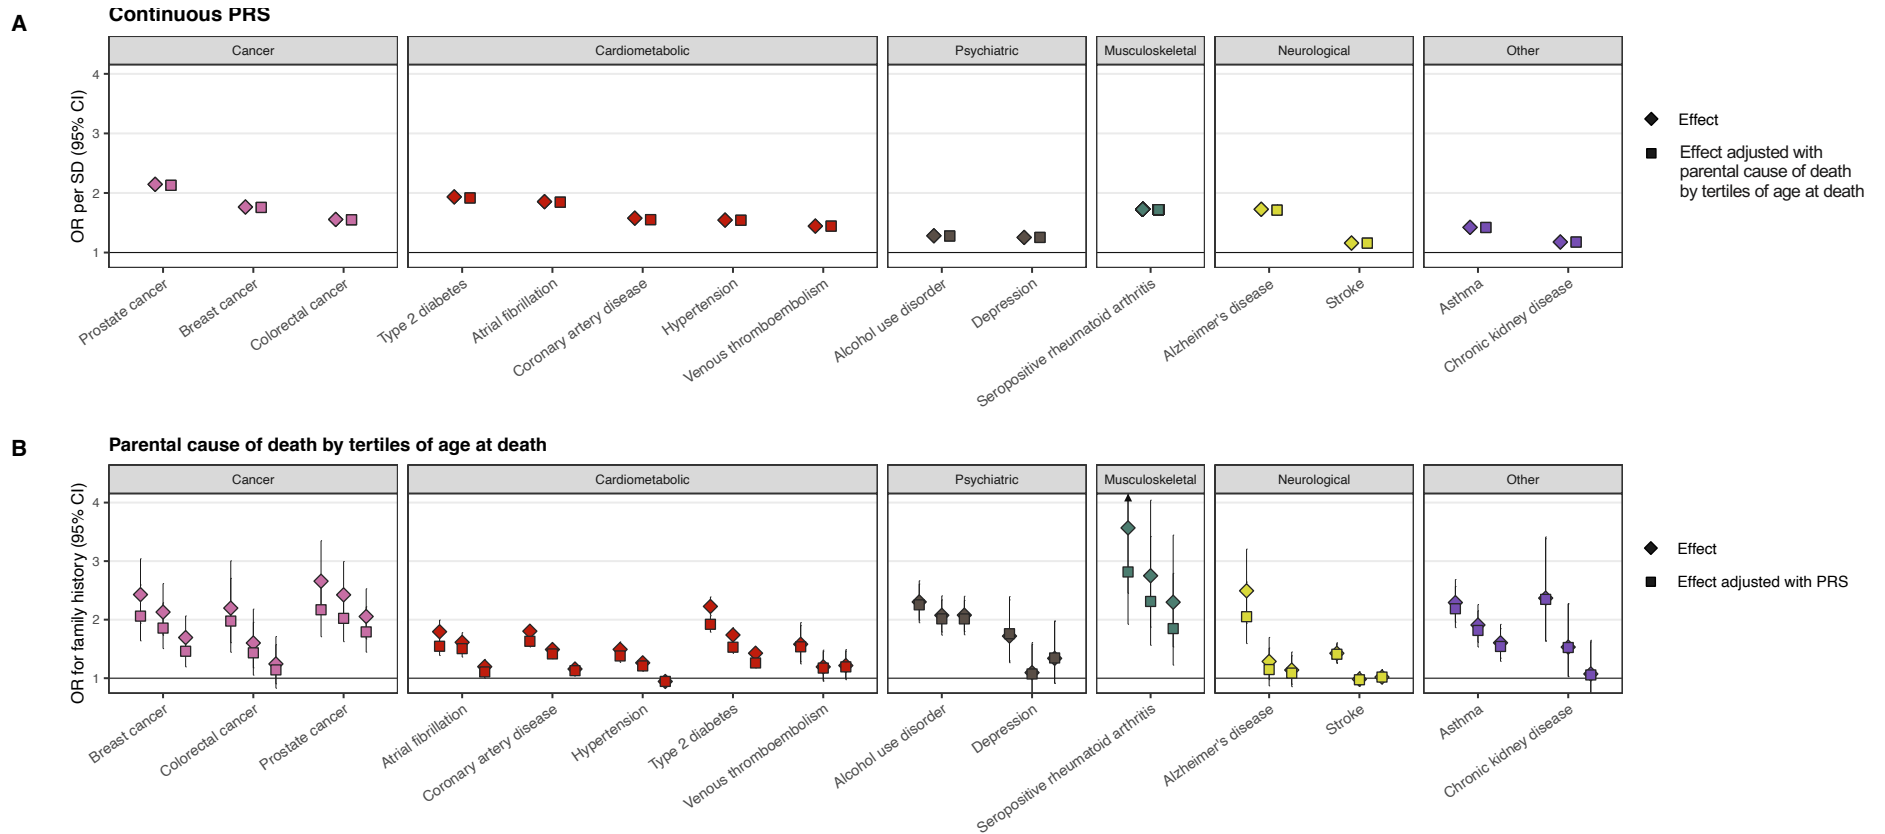

8  
 9  
 10 Sample size: total N = 227,982; N = 133,653 for breast cancer; N = 94,329 for prostate cancer. Odds ratios (OR) were obtained from logistic regression models adjusted for sex (except for breast  
 11 and prostate cancer), birth year, genotyping array, cohort, and the first ten genetic principal components of ancestry. Age limits for tertiles of FH<sub>p</sub>, and the number of individuals with parental  
 12 cause of death in each tertile are reported in Supplementary Table 7.

1  
2  
3

**Figure 5.** Effect sizes of polygenic risk scores stratified by first-degree family history (FH<sub>1st</sub>), assessed for the 10 most prevalent diseases.

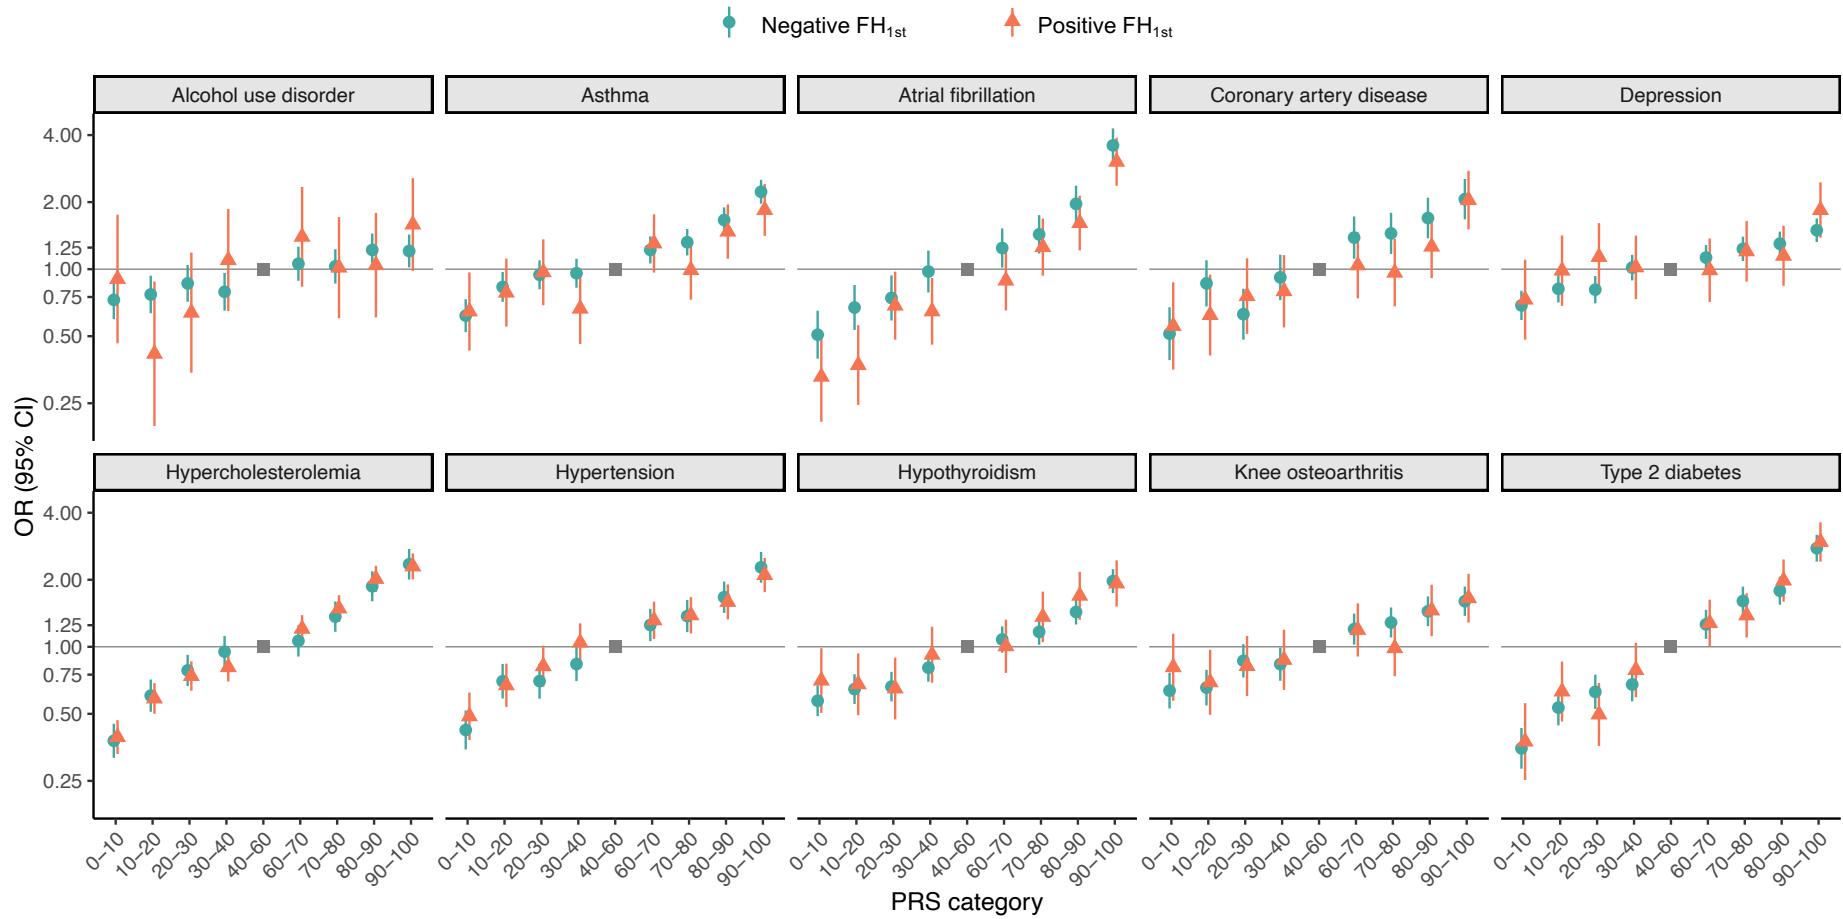

4

1 **Figure 6.** The impact of polygenic risk on disease risk in individuals with positive family history. The survival curves show cumulative incidences for individuals with  
 2 positive first-degree family (FH<sub>1st</sub>), stratified by level of polygenic risk score (PRS). High PRS was defined as top decile of the PRS distribution and low PRS as the  
 3 bottom tertile of the PRS distribution. The figure shows results for the five diseases with the largest effect sizes for PRS, and for breast and prostate cancer. Survival  
 4 curves for a broader set of diseases, and survival curves stratifying individuals with no FH<sub>1st</sub> into similar PRS groups are in **Supplementary Figures 5–6.**  
 5

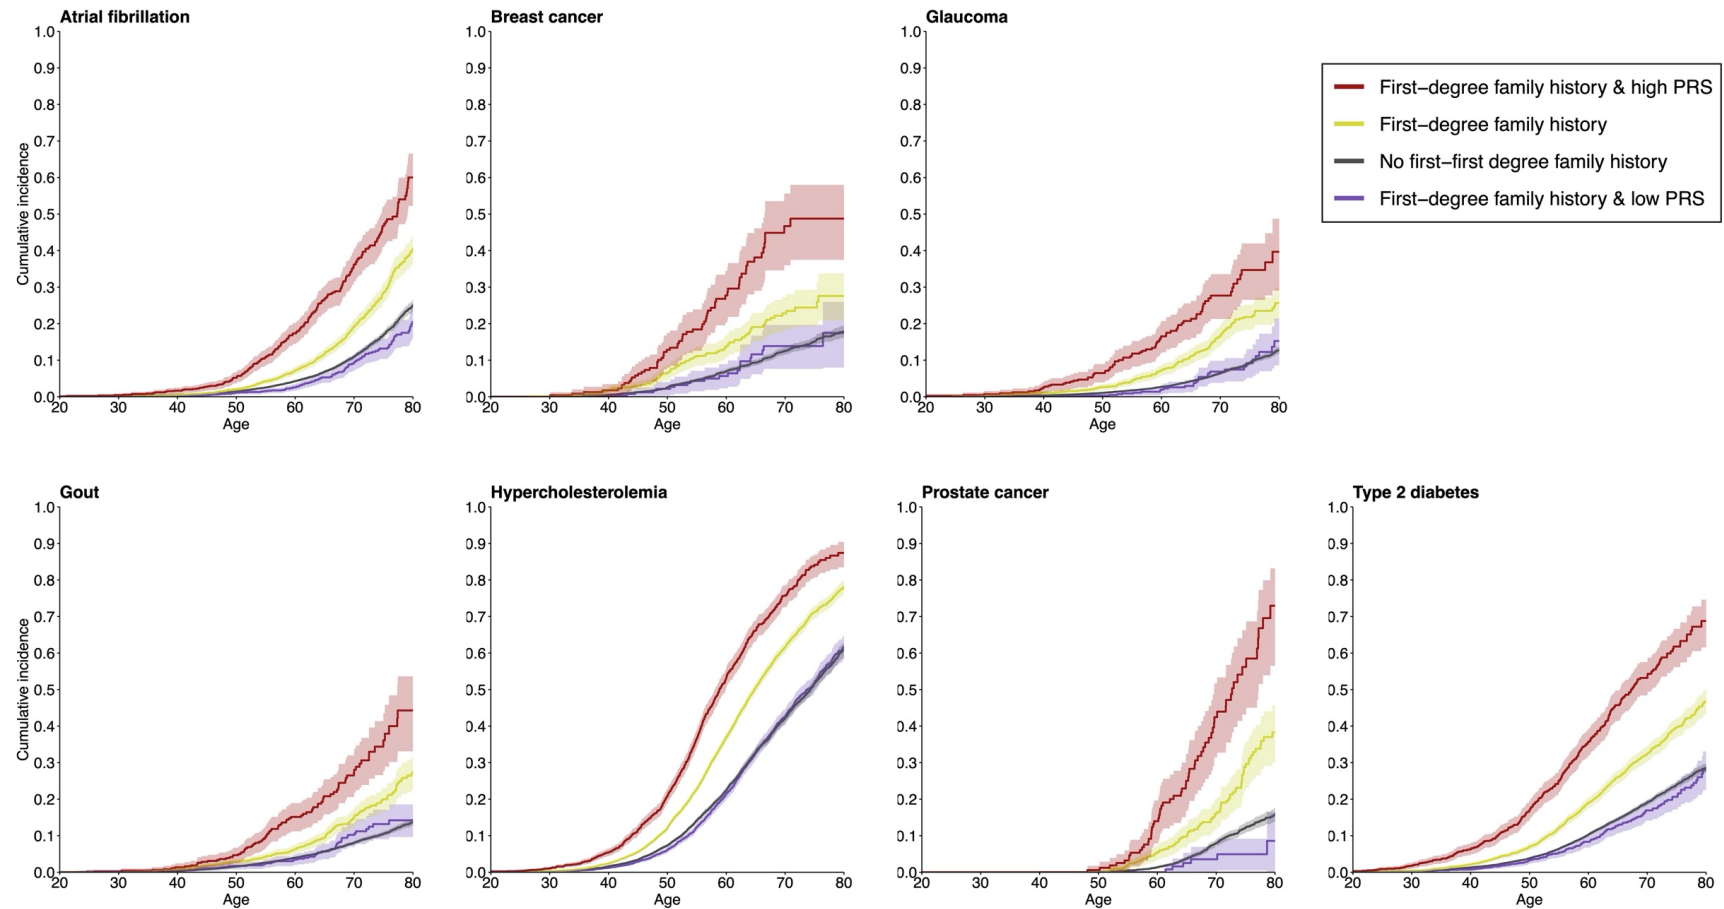

6  
 7  
 8 Total N = 39,444, N = 15,281 for breast cancer, N = 9,473 for prostate cancer. Analyses were performed for diseases with an OR >2 for high PRS in Figure 2 (15/24 diseases), and over 10 cases  
 9 in each subgroup, excluding Alzheimer's disease due to its average onset late in life.
